# Supplementary material for: Theoretical study on the molecular mechanism of the [5 + 2] vs. [4 + 2] cyclization mediated by Lewis acid in the quinone system
Source: Royal Society of Chemistry journal article supplement (doi:10.1039/c3ob41860j), 2013-01-01
Supplement: c3ob41860j.pdf [file c3ob41860j.pdf]

# Theoretical Study on the Molecular Mechanism of the [5+2] vs [4+2] Cyclization Mediated by Lewis Acid in the Quinone System

## Supporting Information

*Jorge Soto-Delgado<sup>a\*</sup>, Jose A. Sáez<sup>b</sup>, Ricardo A. Tapia<sup>a</sup> and Luis R. Domingo<sup>c\*</sup>*

<sup>a</sup> *Departamento de Química Orgánica, Facultad de Química, Pontificia Universidad Católica de Chile, Santiago, Chile.*

<sup>b</sup> *Instituto de Tecnología Química UPV-CSIC, Valencia, Spain.*

<sup>c</sup> *Departamento de Química Orgánica, Universidad de Valencia, Valencia, Spain.*

## Index

- S12** **Table S1.** B3LYP/6-311G(d,p) total energies, E, enthalpies, H, entropies, S, and free energies, G, <sup>a,b</sup> associated with the cyclizations of quinones **1** and **1-B**.
- S13** **Figure S1.** Attractor positions and atom numbering of some selected points of the IRC of the one-step mechanism associated with the thermal cyclization of quinone **1**.
- S14** **Figure S2.** Attractor positions and atom numbering of some selected points of the IRC of the one-step mechanism associated with the LA catalyzed cyclization of quinone **1B**.
- S15** B3LYP/6-311G(d,p) computed total energies, unique imaginary frequency, and cartesian coordinates of the stationary points involved in the cyclizations of quinones **1** and **1-B**.

**Table S1.** B3LYP/6-311G(d,p) total energies, E, enthalpies, H, entropies, S, and free energies, G,<sup>a,b</sup> associated with the cyclizations of quinones **1** and **1-B**.

|                          | E            | H           | S       | G           |
|--------------------------|--------------|-------------|---------|-------------|
| <i>E-1</i> <sup>a</sup>  | -1042.995174 | -1042.51141 | 226.22  | -1042.67477 |
| <b>TS4n</b>              | -1042.945473 | -1042.46238 | 214.03  | -1042.61694 |
| <b>4n</b>                | -1042.988271 | -1042.50211 | 209.43  | -1042.65335 |
| <b>TS4x</b>              | -1042.939222 | -1042.45624 | 214.63  | -1042.61123 |
| <b>4x</b>                | -1043.010735 | -1042.52438 | 210.85  | -1042.67665 |
| <b>TS5</b>               | -1042.936879 | -1042.45431 | 213.00  | -1042.60813 |
| <b>5</b>                 | -1042.962829 | -1042.47776 | 213.14  | -1042.63168 |
| <i>E-1B</i> <sup>b</sup> | -1367.664394 | -1367.20979 | 158.76  | -1367.25916 |
| <b>TS4n-B</b>            | -1367.636773 | -1367.18135 | 143.41  | -1367.22595 |
| <b>4n-B</b>              | -1367.660090 | -1367.20193 | 142.33  | -1367.24619 |
| <b>TS4x-B</b>            | -1367.625418 | -1367.17021 | 141.74  | -1367.21429 |
| <b>4x-B</b>              | -1367.682631 | -1367.22462 | 141.80  | -1367.26872 |
| <b>TS5-B</b>             | -1367.639506 | -1367.18492 | 143.44  | -1367.22953 |
| <b>5-B</b>               | -1367.680857 | -1367.22288 | 141.458 | -1367.26687 |

a) in toluene, computed at 180 °C.

b) in dichloromethane, computed at -78 °C.

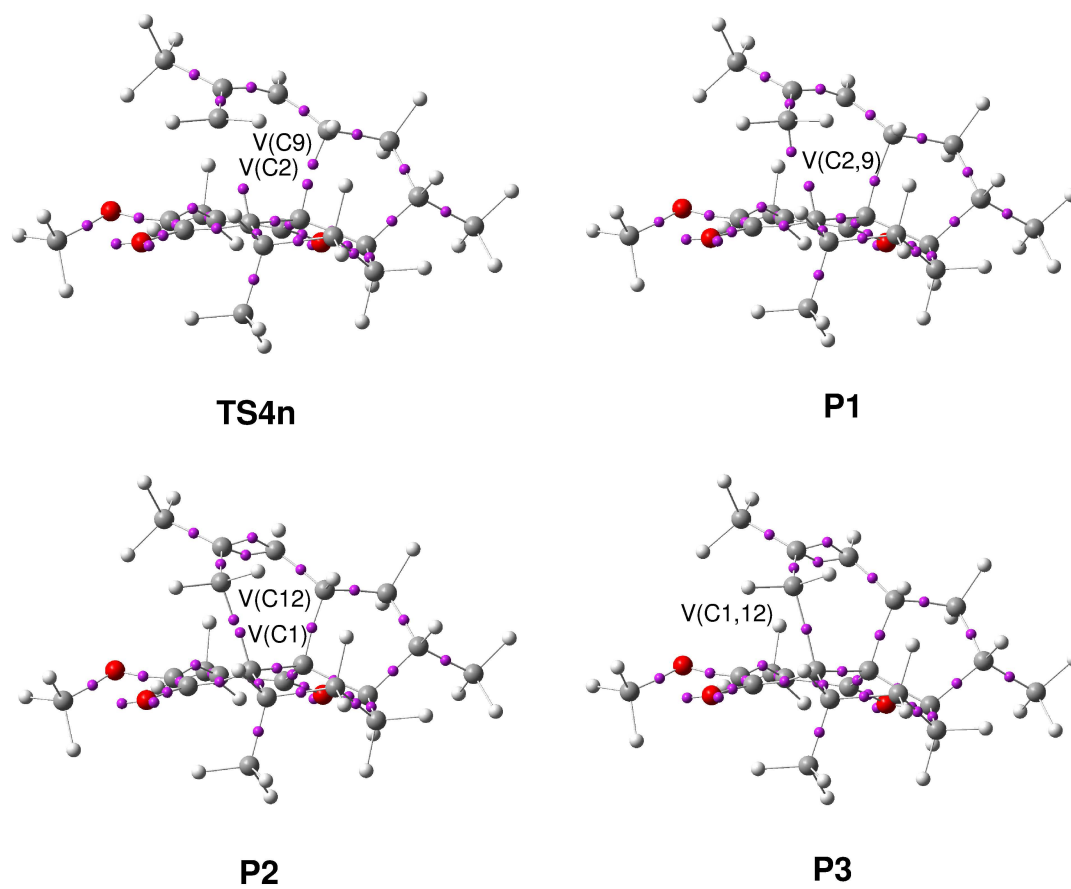

**Figure S1.** Attractor positions and atom numbering of some selected points of the IRC of the one-step mechanism associated with the thermal cyclization of quinone **1**.

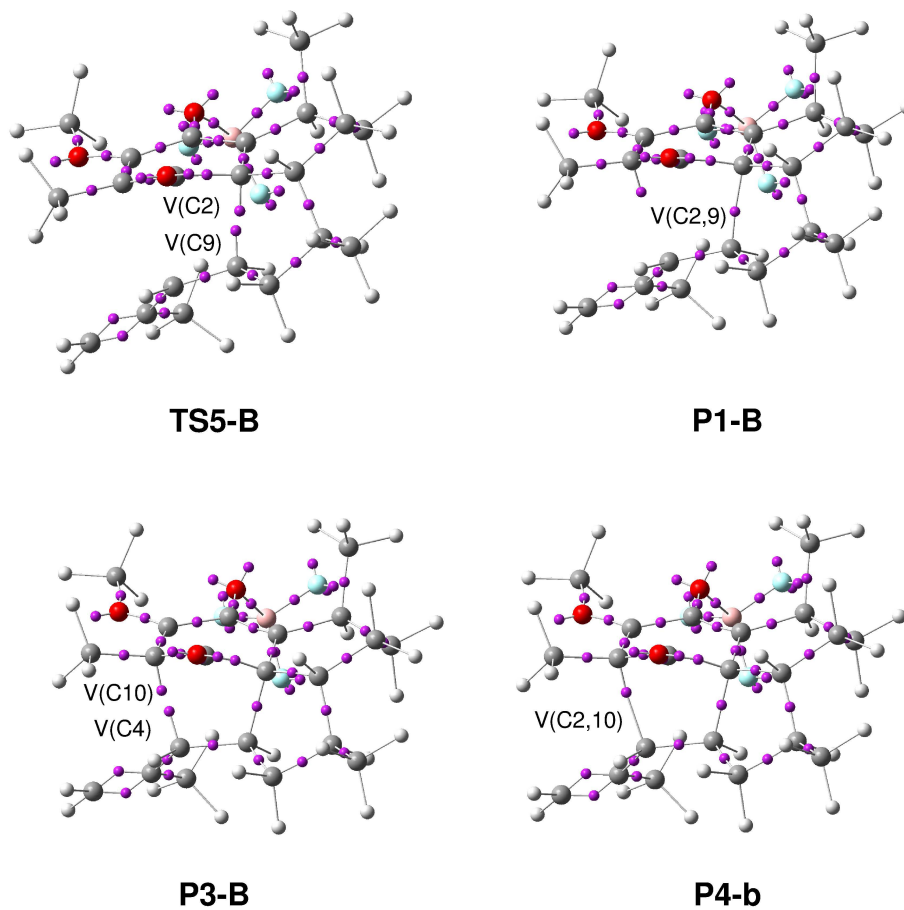

**Figure S2.** Attractor positions and atom numbering of some selected points of the IRC of the one-step mechanism associated with the LA catalyzed cyclization of quinone **1B**.

B3LYP/6-311G(d,p) computed total energies, unique imaginary frequency, and cartesian coordinates of the stationary points involved in the cyclizations of quinones **1** and **1-B**.

*E-1*

E(RB3LYP) = -1042.995174 a.u.

|   |             |             |             |
|---|-------------|-------------|-------------|
| C | -3.06621900 | -0.34766700 | -0.17370100 |
| C | -1.70126000 | -0.95072600 | -0.17683200 |
| C | -0.62066300 | -0.19608100 | 0.11890800  |
| C | -0.77909400 | 1.29277200  | 0.26755600  |
| C | -2.12039900 | 1.90742900  | 0.23996200  |
| C | -3.20280800 | 1.13712500  | -0.02861700 |
| C | 0.78794300  | -0.74010600 | 0.22671900  |
| C | 0.88920000  | -2.17392600 | -0.33456500 |
| C | -0.32613700 | -3.04963800 | -0.00346000 |
| C | -1.63884400 | -2.42851600 | -0.50085300 |
| C | -1.85627900 | -2.65809000 | -2.01326300 |
| C | 1.38082600  | -0.54941400 | 1.66592100  |
| C | 0.76184500  | -1.44548600 | 2.74658600  |
| O | 0.21382400  | 2.00598700  | 0.36806600  |
| C | -2.21935500 | 3.39096300  | 0.44792000  |
| O | -4.41456900 | 1.72627400  | -0.04676500 |
| C | -5.53474800 | 1.20236200  | -0.78793600 |
| O | -4.05901300 | -1.05634600 | -0.25105700 |
| C | 2.92325400  | -0.69826000 | 1.66924100  |
| C | 3.64020500  | 0.27670200  | 0.78145000  |
| C | 4.53041600  | -0.05776000 | -0.16340700 |
| C | 5.25737900  | 0.86946500  | -1.03663400 |
| C | 6.12538000  | 0.39250800  | -1.94271600 |
| C | 5.00881000  | 2.35110000  | -0.89443900 |
| H | 1.40358000  | -0.09108400 | -0.40430200 |
| H | 0.99870100  | -2.11258500 | -1.42216600 |
| H | 1.80171800  | -2.65338500 | 0.02809500  |
| H | -0.20243300 | -4.04010000 | -0.45291400 |
| H | -0.39312200 | -3.20484700 | 1.07513200  |
| H | -2.47682900 | -2.90709200 | 0.01368400  |
| H | -2.14904300 | 3.92319900  | -0.50755800 |
| H | -3.17289700 | 3.65703200  | 0.90321600  |
| H | -1.39755100 | 3.74054400  | 1.07196600  |
| H | -6.02496500 | 0.39914000  | -0.24289900 |
| H | -6.20718400 | 2.05140600  | -0.90400600 |
| H | -5.22478800 | 0.84316700  | -1.77038600 |
| H | -1.87733400 | -3.73037300 | -2.22666600 |
| H | -2.80511900 | -2.23237100 | -2.34390700 |
| H | -1.05517500 | -2.20863700 | -2.60598900 |
| H | 1.17346800  | 0.48831400  | 1.93756300  |
| H | 1.12315500  | -1.14269900 | 3.73367600  |
| H | -0.32880500 | -1.37466800 | 2.75924400  |
| H | 1.03184500  | -2.49666700 | 2.61103100  |
| H | 3.21263600  | -1.72288400 | 1.41189500  |
| H | 3.25327200  | -0.54046600 | 2.70511300  |
| H | 3.39795900  | 1.32469900  | 0.94302700  |
| H | 4.75484300  | -1.11267000 | -0.31543200 |
| H | 6.30554700  | -0.67242400 | -2.04628400 |
| H | 6.67799200  | 1.05065900  | -2.60359600 |
| H | 3.95418200  | 2.59328800  | -1.05924500 |

|   |            |            |             |
|---|------------|------------|-------------|
| H | 5.26135300 | 2.69799300 | 0.11275600  |
| H | 5.60634600 | 2.91766200 | -1.61004100 |

**E-1B**

E(RB3LYP) = -1367.664394 a.u.

|   |             |             |             |
|---|-------------|-------------|-------------|
| C | -2.23058700 | 0.51872600  | -0.16156600 |
| C | -1.06569300 | -0.36931000 | -0.28744500 |
| C | 0.15131900  | 0.12669600  | 0.05489600  |
| C | 0.30885200  | 1.60070300  | 0.34796400  |
| C | -0.85919100 | 2.50418500  | 0.28702700  |
| C | -2.06597800 | 1.98925600  | -0.05060300 |
| C | 1.41715000  | -0.69109700 | 0.08649700  |
| C | 1.26846900  | -2.01428800 | -0.68890700 |
| C | -0.09159900 | -2.68778100 | -0.48598700 |
| C | -1.26677400 | -1.76749100 | -0.84384300 |
| C | -1.50360700 | -1.68223400 | -2.36851500 |
| C | 1.97318100  | -0.82981400 | 1.55169800  |
| C | 1.15985900  | -1.74901100 | 2.47180900  |
| O | 1.42036200  | 2.06223400  | 0.56104900  |
| C | -0.65633000 | 3.96108400  | 0.56460900  |
| O | -3.13466600 | 2.80200800  | -0.08171500 |
| C | -4.23138200 | 2.59985500  | -1.00634300 |
| O | -3.42009000 | 0.12722700  | -0.11666900 |
| B | -4.33232100 | -1.19420500 | 0.23620900  |
| F | -3.67181900 | -1.84076800 | 1.25179500  |
| F | -5.50862600 | -0.61301400 | 0.62382400  |
| F | -4.43054900 | -1.91149000 | -0.92727500 |
| C | 3.46233900  | -1.25985900 | 1.54342600  |
| C | 4.38119700  | -0.29437800 | 0.85433200  |
| C | 5.20535300  | -0.60764800 | -0.15637500 |
| C | 6.12481000  | 0.30881400  | -0.83942900 |
| C | 6.89794900  | -0.14435500 | -1.83948200 |
| C | 6.17985900  | 1.75119800  | -0.39858600 |
| H | 2.17169800  | -0.08488700 | -0.42472000 |
| H | 1.41282700  | -1.80716500 | -1.75399800 |
| H | 2.06901700  | -2.70208100 | -0.40796700 |
| H | -0.15291500 | -3.59116900 | -1.09968800 |
| H | -0.20174000 | -3.00900400 | 0.55097000  |
| H | -2.16114000 | -2.19716000 | -0.40175900 |
| H | -0.48450200 | 4.50713400  | -0.36999200 |
| H | -1.53840300 | 4.39204800  | 1.03760600  |
| H | 0.21731900  | 4.10917200  | 1.19730800  |
| H | -4.98625000 | 1.95332000  | -0.56552800 |
| H | -4.63699900 | 3.59450800  | -1.18074000 |
| H | -3.87595100 | 2.17952800  | -1.94809100 |
| H | -1.71903700 | -2.67938000 | -2.75980000 |
| H | -2.35687000 | -1.04411100 | -2.60673800 |
| H | -0.62695000 | -1.28854000 | -2.88911500 |
| H | 1.94506600  | 0.17534500  | 1.97913900  |
| H | 1.52745000  | -1.66032500 | 3.49797600  |
| H | 0.09832300  | -1.48904300 | 2.47876600  |
| H | 1.25062100  | -2.79990800 | 2.18456700  |
| H | 3.57142300  | -2.25920300 | 1.10947200  |
| H | 3.76782200  | -1.34776800 | 2.59450700  |
| H | 4.35744400  | 0.72644400  | 1.22903800  |
| H | 5.21391000  | -1.63399100 | -0.52065900 |
| H | 6.86011700  | -1.18117600 | -2.15719000 |
| H | 7.58758500  | 0.50638500  | -2.36522400 |
| H | 5.20111100  | 2.23201000  | -0.49433800 |

|   |            |            |             |
|---|------------|------------|-------------|
| H | 6.47164500 | 1.83141400 | 0.65348100  |
| H | 6.89789000 | 2.31482200 | -0.99579500 |

**TS4n**

E(RB3LYP) = -1042.945473 a.u.

1 imaginary frequency found: -434.08 cm<sup>-1</sup>

|   |             |             |             |
|---|-------------|-------------|-------------|
| C | 1.49236500  | 1.07440500  | -0.22403600 |
| C | 0.05439300  | 1.10796300  | 0.09426000  |
| C | -0.81799200 | 0.02562200  | -0.28813900 |
| C | -0.20653200 | -1.05036600 | -1.15208800 |
| C | 1.25744500  | -1.21633900 | -1.18408500 |
| C | 2.05598600  | -0.20885100 | -0.75002500 |
| C | -2.31380500 | 0.26696200  | -0.64630600 |
| C | -2.77785400 | 1.72297200  | -0.44006600 |
| C | -2.02386600 | 2.41586000  | 0.69620400  |
| C | -0.52314200 | 2.49914600  | 0.37405500  |
| C | -0.27346400 | 3.47365100  | -0.80326500 |
| C | -3.25629100 | -0.73810600 | 0.10455300  |
| C | -4.34765900 | -1.30504700 | -0.80383700 |
| O | -0.91951200 | -1.79862500 | -1.81559300 |
| C | 1.80316700  | -2.47703800 | -1.79078100 |
| O | 3.39318500  | -0.41623700 | -0.76547900 |
| C | 4.35685100  | 0.62857800  | -1.02009500 |
| O | 2.22826600  | 2.05279500  | -0.08134700 |
| C | -2.40604400 | -1.81816200 | 0.78946700  |
| C | -1.20869600 | -1.09200600 | 1.32456800  |
| C | -0.00335100 | -1.68019200 | 1.76093300  |
| C | 1.04090300  | -0.87808400 | 2.21444100  |
| C | 0.85163500  | 0.50811500  | 2.24945400  |
| C | 2.41328200  | -1.46373600 | 2.46131000  |
| H | -2.38870100 | 0.02635000  | -1.70822500 |
| H | -2.63492800 | 2.29495000  | -1.36016500 |
| H | -3.85473500 | 1.73163900  | -0.24586300 |
| H | -2.41275700 | 3.42696800  | 0.85053400  |
| H | -2.18641800 | 1.88094300  | 1.63966200  |
| H | 0.00236600  | 2.92044700  | 1.23614600  |
| H | 1.14753200  | -2.81430500 | -2.59358100 |
| H | 2.81366000  | -2.32453500 | -2.16713400 |
| H | 1.84344600  | -3.28127100 | -1.04706900 |
| H | 4.51318700  | 1.24797900  | -0.14048200 |
| H | 5.27081900  | 0.09507900  | -1.28124100 |
| H | 4.04127100  | 1.25699500  | -1.85293800 |
| H | -0.79283400 | 4.41764500  | -0.61175100 |
| H | 0.78890400  | 3.67942200  | -0.91085700 |
| H | -0.64094300 | 3.07572800  | -1.75219500 |
| H | -3.74596400 | -0.17388400 | 0.90952400  |
| H | -5.02285800 | -1.96195200 | -0.24707400 |
| H | -4.95277400 | -0.50718500 | -1.24506200 |
| H | -3.90161900 | -1.88232300 | -1.61813600 |
| H | -2.11735700 | -2.60407900 | 0.08849500  |
| H | -2.96677900 | -2.28805100 | 1.60601700  |
| H | -1.50421800 | -0.21354300 | 1.88920900  |
| H | 0.18280100  | -2.73194400 | 1.56156700  |
| H | -0.10864400 | 0.93092900  | 2.50421500  |
| H | 1.69634800  | 1.16518300  | 2.42177400  |
| H | 2.39858200  | -2.55096000 | 2.36397000  |
| H | 3.14276700  | -1.07412700 | 1.74579600  |
| H | 2.77034400  | -1.21763900 | 3.46507600  |

**4n**

E(RB3LYP) = -1042.988271 a.u.

|   |             |             |             |
|---|-------------|-------------|-------------|
| C | -3.26633800 | -0.69059600 | 0.21661200  |
| C | -2.28355100 | 0.26889100  | -0.56003000 |
| C | -0.82848300 | -0.07850700 | -0.02544600 |
| C | -1.20184200 | -0.70496100 | 1.38960400  |
| C | -2.39956000 | -1.59961700 | 1.11488800  |
| C | -0.00552100 | -1.14989600 | 2.16586100  |
| C | 0.94668400  | -0.22796100 | 2.34890100  |
| C | 0.68550200  | 1.12639900  | 1.72542400  |
| C | 0.23414000  | 1.07203100  | 0.19391300  |
| C | -0.29328600 | -1.22370400 | -0.90243200 |
| C | 1.15092600  | -1.49276300 | -1.03476900 |
| C | 2.05400200  | -0.50094100 | -0.83323000 |
| C | 1.59623300  | 0.86936000  | -0.48937500 |
| C | -2.72376000 | 1.75271000  | -0.46347000 |
| C | -1.75507600 | 2.65071500  | 0.30828300  |
| C | -0.31762500 | 2.48244400  | -0.20395000 |
| C | 2.21368600  | -0.44822100 | 3.12452100  |
| O | -1.06486800 | -1.98702800 | -1.47068100 |
| C | 1.55101200  | -2.84012500 | -1.55998400 |
| O | 3.34627500  | -0.75155600 | -1.12787800 |
| C | 4.43491400  | 0.03514500  | -0.60696900 |
| O | 2.34183800  | 1.81770300  | -0.67337800 |
| C | -0.24799900 | 2.77788000  | -1.71616300 |
| C | -4.23636100 | -1.43916400 | -0.69714600 |
| H | -2.31153000 | -0.01969600 | -1.60992200 |
| H | -2.83956600 | 2.15764500  | -1.47181200 |
| H | -3.71602200 | 1.81084700  | -0.00684700 |
| H | -2.05516500 | 3.69731500  | 0.19139200  |
| H | -1.80931500 | 2.44096100  | 1.38155100  |
| H | 0.31809200  | 3.21732600  | 0.29768100  |
| H | 1.41024600  | -2.88689700 | -2.64498500 |
| H | 2.59870900  | -3.04427900 | -1.34601600 |
| H | 0.91989100  | -3.61877300 | -1.12920200 |
| H | 4.29050400  | 0.26484700  | 0.45000800  |
| H | 5.31244300  | -0.59950300 | -0.72387800 |
| H | 4.55201100  | 0.95919300  | -1.16757800 |
| H | -0.81715300 | 3.68398400  | -1.94410200 |
| H | 0.77811400  | 2.93843500  | -2.04042000 |
| H | -0.66873700 | 1.96802800  | -2.31857300 |
| H | -3.85862600 | -0.06060800 | 0.89118200  |
| H | -4.91619000 | -2.06987800 | -0.11518800 |
| H | -4.84945000 | -0.74381300 | -1.27945000 |
| H | -3.68546500 | -2.07562400 | -1.39274100 |
| H | -2.11958700 | -2.52061000 | 0.60023700  |
| H | -2.92020500 | -1.87424500 | 2.03690500  |
| H | -1.61557000 | 0.15902000  | 1.92895500  |
| H | 0.07672800  | -2.16232500 | 2.54995400  |
| H | -0.11685700 | 1.62671500  | 2.27909300  |
| H | 1.55818900  | 1.77771500  | 1.79728900  |
| H | 2.25872700  | -1.46016000 | 3.53254300  |
| H | 3.10146100  | -0.29234500 | 2.50079300  |
| H | 2.29220300  | 0.25905800  | 3.95837300  |

**TS4x**

E(RB3LYP) = -1042.939222 a.u.



1 imaginary frequency found:  $-459.60 \text{ cm}^{-1}$

|   |             |             |             |
|---|-------------|-------------|-------------|
| C | 1.82288100  | -0.56848500 | 0.58638000  |
| C | 0.34258800  | -0.70453500 | 0.53518100  |
| C | -0.47327200 | 0.46320400  | 0.35722500  |
| C | 0.24550700  | 1.78243100  | 0.29788300  |
| C | 1.68573900  | 1.83032400  | -0.03062200 |
| C | 2.43513200  | 0.70793400  | 0.09029700  |
| C | -1.89357500 | 0.60082700  | 0.95173100  |
| C | -2.34400900 | -0.62347700 | 1.77607400  |
| C | -1.75656800 | -1.92842700 | 1.23709900  |
| C | -0.22137500 | -1.90737200 | 1.31068600  |
| C | 0.24698800  | -1.91253500 | 2.78677300  |
| C | -2.97215400 | 0.97439700  | -0.12252700 |
| C | -4.02806600 | 1.93494300  | 0.42877100  |
| O | -0.35113100 | 2.83904400  | 0.49275000  |
| C | 2.28281900  | 3.16852700  | -0.35802400 |
| O | 3.77084900  | 0.80850500  | -0.07990300 |
| C | 4.57862400  | -0.31063800 | -0.49366900 |
| O | 2.55062600  | -1.46142800 | 1.00516300  |
| C | -2.29374400 | 1.50804700  | -1.39979800 |
| C | -1.15797500 | 0.57609000  | -1.71276700 |
| C | -1.45465900 | -0.74161800 | -2.09208300 |
| C | -0.54506800 | -1.79111900 | -2.02542100 |
| C | 0.73542000  | -1.52890700 | -1.52874300 |
| C | -0.98256400 | -3.21320500 | -2.28905000 |
| H | -1.83286500 | 1.46295500  | 1.61940100  |
| H | -2.04720100 | -0.49906300 | 2.82060400  |
| H | -3.43717700 | -0.67363200 | 1.77979400  |
| H | -2.12803000 | -2.77991600 | 1.81610300  |
| H | -2.08276400 | -2.08592700 | 0.20584900  |
| H | 0.16651300  | -2.82281400 | 0.85753900  |
| H | 2.52049400  | 3.72084500  | 0.55765400  |
| H | 3.20598200  | 3.05187400  | -0.92456400 |
| H | 1.57233200  | 3.77799500  | -0.91750600 |
| H | 4.08714300  | -0.88128500 | -1.28444200 |
| H | 5.49173300  | 0.13645600  | -0.88511600 |
| H | 4.79985500  | -0.96478700 | 0.34567800  |
| H | -0.29996200 | -2.68247600 | 3.33987200  |
| H | 1.31044200  | -2.12854000 | 2.85655200  |
| H | 0.06469900  | -0.95489100 | 3.28072300  |
| H | -3.47754200 | 0.04021500  | -0.39999000 |
| H | -3.57157300 | 2.89115200  | 0.70044500  |
| H | -4.81091600 | 2.12881100  | -0.31062100 |
| H | -4.51123700 | 1.52688700  | 1.32138900  |
| H | -1.93759700 | 2.52607600  | -1.24532800 |
| H | -3.01799600 | 1.53070300  | -2.22265900 |
| H | -0.20346600 | 0.99285700  | -2.02068200 |
| H | -2.50219000 | -0.99569000 | -2.23918100 |
| H | 1.21087600  | -0.59171700 | -1.78862400 |
| H | 1.41696200  | -2.35274700 | -1.34549800 |
| H | -2.07033500 | -3.30257600 | -2.32317100 |
| H | -0.59058200 | -3.56455000 | -3.24926800 |
| H | -0.60437300 | -3.89362500 | -1.52141500 |

4x

E(RB3LYP) = -1043.010735 a.u.

|   |             |             |            |
|---|-------------|-------------|------------|
| C | -0.07438000 | -0.36113100 | 2.29864000 |
| C | -0.12823000 | 0.37859600  | 0.88323200 |

|   |             |             |             |
|---|-------------|-------------|-------------|
| C | 0.65940400  | -0.39218600 | -0.22244200 |
| C | 2.12213200  | -0.78702000 | 0.19351900  |
| C | 2.40414000  | -0.72881100 | 1.69840900  |
| C | 1.18795400  | -1.23583500 | 2.46949800  |
| C | 0.84017700  | 0.45101800  | -1.55885700 |
| C | 2.28204100  | 0.11941600  | -2.01456300 |
| C | 3.07465700  | 0.02249900  | -0.70797000 |
| C | 0.43477400  | 1.80981600  | 1.06354200  |
| C | 0.52298600  | 2.57800100  | -0.23061700 |
| C | 0.66494800  | 1.93580000  | -1.39097600 |
| C | -1.61085000 | 0.56666900  | 0.50480800  |
| C | -2.25801300 | -0.40130500 | -0.43084800 |
| C | -1.58835800 | -1.48455400 | -0.90325500 |
| C | -0.13708300 | -1.64052500 | -0.64598900 |
| C | 4.46579300  | -0.59289700 | -0.85937100 |
| C | 0.43222900  | 4.07569000  | -0.13134900 |
| O | 0.39523700  | -2.71391900 | -0.88209100 |
| C | -2.26982900 | -2.58088100 | -1.66721500 |
| O | -3.58473600 | -0.31615700 | -0.67220900 |
| C | -4.24988000 | 0.95471700  | -0.83139000 |
| O | -2.28278900 | 1.43366200  | 1.03609100  |
| C | -1.30701300 | -1.19504000 | 2.69053100  |
| H | 2.22441000  | -1.83426900 | -0.10637200 |
| H | 3.27200500  | -1.35472900 | 1.92716700  |
| H | 2.66978000  | 0.28398700  | 2.01948200  |
| H | 0.96708200  | -2.25451900 | 2.12857200  |
| H | 1.40697900  | -1.31386400 | 3.53920000  |
| H | -0.01320100 | 0.45633700  | 3.02414200  |
| H | -2.46769500 | -3.43543900 | -1.01070100 |
| H | -3.22044100 | -2.24000100 | -2.07304300 |
| H | -1.62548300 | -2.94686000 | -2.46810300 |
| H | -3.61751800 | 1.66392600  | -1.36806600 |
| H | -5.13539700 | 0.73232300  | -1.42621200 |
| H | -4.53142600 | 1.37210900  | 0.13202600  |
| H | -1.15370900 | -1.59976900 | 3.69508200  |
| H | -2.22486800 | -0.60543200 | 2.71336600  |
| H | -1.45797400 | -2.04494600 | 2.02017600  |
| H | 3.18291400  | 1.03437900  | -0.29585600 |
| H | 4.40004100  | -1.60827100 | -1.26441500 |
| H | 5.08725500  | -0.00082700 | -1.53798900 |
| H | 4.98874600  | -0.64854300 | 0.09976200  |
| H | 2.29953700  | -0.84955500 | -2.52603400 |
| H | 2.67419900  | 0.86787000  | -2.70856400 |
| H | 0.13022700  | 0.11616900  | -2.32213200 |
| H | 0.70966700  | 2.50940200  | -2.31529800 |
| H | -0.22824200 | 2.33879100  | 1.75187300  |
| H | 1.41410900  | 1.77844800  | 1.54848000  |
| H | 0.54580000  | 4.55505000  | -1.10592700 |
| H | -0.53148600 | 4.37683000  | 0.29495200  |
| H | 1.20738600  | 4.47049600  | 0.53606400  |

### TS5

E(RB3LYP) = -1042.936879 a.u.

1 imaginary frequency found: -411.11 cm<sup>-1</sup>

|   |             |             |             |
|---|-------------|-------------|-------------|
| C | 0.12251500  | -0.56083700 | 1.48858800  |
| C | 0.94995300  | 0.02372900  | 0.35149000  |
| C | 0.43152200  | 1.29376700  | -0.08973100 |
| C | -0.97556000 | 1.58710900  | -0.06893200 |
| C | -1.83355700 | 0.61645300  | 0.61903800  |

|   |             |             |             |
|---|-------------|-------------|-------------|
| C | -1.33626300 | -0.55307400 | 1.21009800  |
| C | 2.47979100  | -0.15690000 | 0.51457500  |
| C | 3.27592400  | 1.12579700  | 0.23593000  |
| C | 2.73522700  | 1.84860300  | -0.99962700 |
| C | 1.30000400  | 2.33825300  | -0.76003000 |
| C | 1.29117000  | 3.65870600  | 0.05007100  |
| C | 2.94222500  | -1.33405800 | -0.38439900 |
| C | 4.16239200  | -2.07437200 | 0.16579300  |
| O | -1.47109400 | 2.58600400  | -0.64674400 |
| O | -3.16178200 | 0.73996100  | 0.68227100  |
| C | -3.89138200 | 1.96081100  | 0.40741000  |
| C | -2.23972200 | -1.39151800 | 2.07143000  |
| O | 0.60074100  | -1.07803100 | 2.47403000  |
| C | 1.72064400  | -2.23442600 | -0.56557900 |
| C | 0.51709700  | -1.33235000 | -0.81735600 |
| C | -0.78329200 | -1.88297900 | -0.49744200 |
| C | -1.94384200 | -1.86555900 | -1.38351500 |
| C | -2.90204800 | -2.79969200 | -1.22258600 |
| C | -2.04354200 | -0.83431500 | -2.48242100 |
| H | 2.63606800  | -0.45831600 | 1.55393900  |
| H | 3.22634100  | 1.79253100  | 1.10230600  |
| H | 4.33279000  | 0.87318100  | 0.10518400  |
| H | 3.36992800  | 2.70151400  | -1.25776800 |
| H | 2.76224200  | 1.17389900  | -1.86265500 |
| H | 0.82466200  | 2.57306500  | -1.72076400 |
| H | -1.67872200 | -2.20565200 | 2.52962500  |
| H | -2.68451300 | -0.78886200 | 2.86857900  |
| H | -3.06393700 | -1.79863200 | 1.48069000  |
| H | -3.85424300 | 2.21227700  | -0.64788800 |
| H | -4.90833500 | 1.72996100  | 0.72263900  |
| H | -3.49169000 | 2.78764400  | 0.99102000  |
| H | 1.85538100  | 4.42461300  | -0.49043600 |
| H | 0.27085700  | 4.01381700  | 0.18391700  |
| H | 1.75085400  | 3.52819700  | 1.03338200  |
| H | 3.20439300  | -0.92685200 | -1.36949200 |
| H | 4.47538600  | -2.87671500 | -0.50898000 |
| H | 5.01531500  | -1.40221500 | 0.29384100  |
| H | 3.93881400  | -2.52016000 | 1.14022200  |
| H | 1.55254600  | -2.82504300 | 0.34215100  |
| H | 1.85290800  | -2.94277700 | -1.38997100 |
| H | 0.56795900  | -0.82728400 | -1.77829300 |
| H | -0.76861700 | -2.72409000 | 0.18990000  |
| H | -2.83163200 | -3.55823700 | -0.45124300 |
| H | -3.76818600 | -2.83904100 | -1.87276800 |
| H | -2.01704800 | 0.18567200  | -2.09152800 |
| H | -1.21421500 | -0.92676900 | -3.19077300 |
| H | -2.97375900 | -0.95809100 | -3.03812200 |

## 5

E(RB3LYP) = -1042.962829 a.u.

|   |             |             |             |
|---|-------------|-------------|-------------|
| C | -0.94896500 | -1.72171200 | -0.02407300 |
| C | -1.36220000 | -0.55423700 | 0.97547700  |
| C | 0.05347100  | -0.19549600 | 1.51900900  |
| C | 0.92926300  | -0.07592100 | 0.25673100  |
| C | 0.43327200  | -1.31899400 | -0.59104400 |
| C | 0.47677400  | 1.22191400  | -0.34257300 |
| C | -0.90450000 | 1.51432500  | -0.53149300 |
| C | -1.79012800 | 0.70959600  | 0.29598300  |
| C | 1.45019900  | 2.25349200  | -0.85386600 |

|   |             |             |             |
|---|-------------|-------------|-------------|
| C | 2.88586900  | 1.72034600  | -0.97148700 |
| C | 3.31155400  | 0.96196200  | 0.28671900  |
| C | 2.44877100  | -0.28719300 | 0.51429300  |
| C | 1.56107500  | -2.34755600 | -0.43452300 |
| C | 2.84406800  | -1.50466800 | -0.36408000 |
| O | -3.03364700 | 1.03931000  | 0.55886100  |
| C | -3.61309400 | 2.35285500  | 0.29981600  |
| C | -2.32194900 | -1.02219700 | 2.06430400  |
| O | 0.37262500  | -0.09409500 | 2.66899900  |
| O | -1.33814200 | 2.45790500  | -1.25557400 |
| C | 1.37191400  | 3.54548300  | -0.00281200 |
| C | 4.06096100  | -2.27218500 | 0.15202200  |
| C | -2.01354500 | -2.14339500 | -1.01887400 |
| C | -2.30783600 | -1.27234500 | -2.21665100 |
| C | -2.66925300 | -3.29256900 | -0.82971500 |
| H | 2.55230700  | -0.58688200 | 1.56295200  |
| H | 3.23626000  | 1.62296500  | 1.15619800  |
| H | 4.36393300  | 0.66803600  | 0.22057700  |
| H | 3.56440900  | 2.55785000  | -1.15971400 |
| H | 2.96224300  | 1.06145100  | -1.84352800 |
| H | 1.08010900  | 2.53235600  | -1.84777500 |
| H | -1.87977300 | -1.86401000 | 2.60039800  |
| H | -2.52115300 | -0.22782500 | 2.78373600  |
| H | -3.27014200 | -1.34240200 | 1.63175700  |
| H | -3.42197300 | 2.65687000  | -0.72213800 |
| H | -4.66927900 | 2.22102400  | 0.52311800  |
| H | -3.16811800 | 3.07117200  | 0.98887000  |
| H | 2.01734300  | 4.31446100  | -0.43719300 |
| H | 0.34852500  | 3.92068600  | 0.00419200  |
| H | 1.69171800  | 3.37091300  | 1.02749700  |
| H | 3.06602300  | -1.14317700 | -1.37666400 |
| H | 4.29898100  | -3.11792900 | -0.49973900 |
| H | 4.94922900  | -1.63618500 | 0.20067400  |
| H | 3.87524800  | -2.66432500 | 1.15745400  |
| H | 1.43934000  | -2.90289700 | 0.50422100  |
| H | 1.57667900  | -3.08075700 | -1.24524300 |
| H | 0.35851000  | -1.01528000 | -1.63565100 |
| H | -0.79081100 | -2.57372500 | 0.64384300  |
| H | -2.45856400 | -3.93763100 | 0.01658600  |
| H | -3.43686800 | -3.62711000 | -1.51933600 |
| H | -2.57609300 | -0.25015000 | -1.93747700 |
| H | -1.43832200 | -1.19115800 | -2.87648300 |
| H | -3.13078000 | -1.69033700 | -2.79839900 |

### TS4n-B

E(RB3LYP) = -1367.636773 a.u.

1 imaginary frequency found: -116.15 cm<sup>-1</sup>

|   |             |             |             |
|---|-------------|-------------|-------------|
| C | -1.92701500 | -0.45444300 | 1.34582700  |
| C | -1.46106000 | 0.06060300  | -0.18224600 |
| C | -2.75870600 | 0.85126600  | -0.61231100 |
| C | -3.92036900 | 0.39948400  | 0.33633700  |
| C | -3.39653300 | -0.78844900 | 1.15346600  |
| C | -2.61607000 | 2.38703300  | -0.63895400 |
| C | -1.51576400 | 2.89221500  | 0.29514500  |
| C | -0.15149600 | 2.33160900  | -0.13283300 |
| C | -0.15861300 | 0.80328100  | -0.14552500 |
| C | -1.36540900 | -1.25492500 | -0.96413400 |
| C | -0.08001200 | -1.98470300 | -0.98196400 |
| C | 1.07194800  | -1.28979700 | -0.78909700 |

|   |             |             |             |
|---|-------------|-------------|-------------|
| C | 1.05500300  | 0.14455600  | -0.45758800 |
| C | 0.25395400  | 2.89310400  | -1.52100000 |
| O | 2.15998700  | 0.81250500  | -0.64266000 |
| B | 3.36539400  | 1.10554400  | 0.23575400  |
| F | 4.39596900  | 1.42535000  | -0.63440100 |
| O | 2.26663500  | -1.92477900 | -0.86364900 |
| C | 3.13044600  | -1.65834500 | -1.99534900 |
| C | -0.10879500 | -3.42475800 | -1.39652400 |
| O | -2.33736600 | -1.73422700 | -1.52308500 |
| C | -5.22779300 | 0.12837400  | -0.40711700 |
| C | -1.01212600 | -1.45268500 | 1.91083900  |
| C | 0.27407500  | -1.11006300 | 2.23044800  |
| C | 1.31724200  | -2.12855900 | 2.61979900  |
| F | 3.66461200  | -0.01596100 | 1.01468800  |
| F | 3.03953800  | 2.18530700  | 1.07011000  |
| C | 0.65993400  | 0.23442700  | 2.01049200  |
| H | -2.99764100 | 0.50426900  | -1.61745200 |
| H | -2.40381500 | 2.72673900  | -1.65491100 |
| H | -3.57676400 | 2.83428100  | -0.36925400 |
| H | -1.46862700 | 3.98415900  | 0.27027800  |
| H | -1.74069400 | 2.62348300  | 1.33346100  |
| H | 0.61698200  | 2.65975700  | 0.57033600  |
| H | -0.43290800 | -3.51238400 | -2.43745100 |
| H | 0.87367100  | -3.87927100 | -1.29134500 |
| H | -0.83346300 | -3.98053800 | -0.79681500 |
| H | 3.53882400  | -0.65141000 | -1.95101300 |
| H | 3.93131400  | -2.39091900 | -1.92171900 |
| H | 2.57918200  | -1.80813600 | -2.92705100 |
| H | 0.11228600  | 3.97722500  | -1.52071600 |
| H | 1.29797000  | 2.68256900  | -1.73784300 |
| H | -0.35176400 | 2.47519900  | -2.32751300 |
| H | -4.09502000 | 1.21885800  | 1.04462000  |
| H | -6.02467600 | -0.15024900 | 0.28858500  |
| H | -5.56218200 | 1.01362700  | -0.95620100 |
| H | -5.09828700 | -0.68689000 | -1.12417200 |
| H | -3.52519200 | -1.73140400 | 0.61737700  |
| H | -3.90397700 | -0.87995700 | 2.11747800  |
| H | -1.86768400 | 0.47255500  | 1.91884900  |
| H | -1.33043700 | -2.48959000 | 1.96884300  |
| H | -0.03187200 | 1.04025600  | 2.20939900  |
| H | 1.70268800  | 0.51362400  | 2.06990700  |
| H | 0.89373300  | -3.13345200 | 2.65060000  |
| H | 2.14484600  | -2.11636300 | 1.90621800  |
| H | 1.73436100  | -1.89936100 | 3.60406100  |

#### 4n-B

E(RB3LYP) = -1367.660090 a.u.

|   |             |             |             |
|---|-------------|-------------|-------------|
| C | -0.26398600 | -2.07980200 | -0.24495900 |
| C | -0.05538200 | -0.60841700 | 0.24406600  |
| C | 1.42376700  | -0.10381900 | -0.03326500 |
| C | 2.50376500  | -1.09278600 | -0.64471000 |
| C | 2.19499100  | -2.61096700 | -0.55175500 |
| C | 0.91175700  | -2.95690000 | 0.20508800  |
| C | 2.12516200  | 0.24529600  | 1.35683100  |
| C | 3.58293700  | 0.47774200  | 0.99412900  |
| C | 3.86680900  | -0.71656600 | 0.05662200  |
| C | -0.37128300 | -0.49724400 | 1.82015000  |
| C | 0.05723300  | 0.81898600  | 2.42799800  |
| C | 1.32034300  | 1.19105500  | 2.18654800  |

|   |             |             |             |
|---|-------------|-------------|-------------|
| C | -1.16329600 | 0.27702400  | -0.29529200 |
| C | -0.93379900 | 1.67943100  | -0.64235600 |
| C | 0.32676200  | 2.13896300  | -0.84124600 |
| C | 1.45815700  | 1.17312300  | -0.87188500 |
| C | 5.01937800  | -0.49615000 | -0.92317200 |
| C | -0.94443700 | 1.61875500  | 3.21018600  |
| O | 2.41711700  | 1.46320300  | -1.56846900 |
| C | 0.62462900  | 3.56081800  | -1.18252900 |
| O | -1.97983800 | 2.53911100  | -0.66650400 |
| C | -3.06026300 | 2.34942400  | -1.61624600 |
| O | -2.36863900 | -0.07023700 | -0.32613200 |
| B | -3.50739400 | -1.19074900 | 0.01216800  |
| F | -3.19226500 | -1.76654700 | 1.22210300  |
| C | -0.46647400 | -2.17605800 | -1.76961200 |
| F | -3.48876000 | -2.06945600 | -1.03890200 |
| F | -4.64047800 | -0.41917800 | 0.06320500  |
| H | 2.59901500  | -0.83864000 | -1.69918700 |
| H | 2.12134000  | -3.01699300 | -1.56352300 |
| H | 3.03734300  | -3.12890500 | -0.08588400 |
| H | 0.65344000  | -4.00534600 | 0.02724100  |
| H | 1.06394000  | -2.86583400 | 1.28473700  |
| H | -1.16519400 | -2.45341900 | 0.24137500  |
| H | -0.28770700 | 4.13340000  | -1.32799000 |
| H | 1.20249100  | 4.01837000  | -0.37157700 |
| H | 1.25112800  | 3.60397900  | -2.07482100 |
| H | -3.80876400 | 1.66988500  | -1.21640400 |
| H | -3.48672300 | 3.33999900  | -1.76478300 |
| H | -2.67271200 | 1.97317600  | -2.56516100 |
| H | -0.51055700 | -3.22764500 | -2.06579700 |
| H | -1.40241800 | -1.71784000 | -2.08307400 |
| H | 0.34903900  | -1.71079900 | -2.32809500 |
| H | 4.13442300  | -1.56011800 | 0.70270300  |
| H | 5.94533500  | -0.26127000 | -0.38882900 |
| H | 5.20388200  | -1.39149300 | -1.52505200 |
| H | 4.79352900  | 0.33049200  | -1.60029800 |
| H | 3.73730200  | 1.43387700  | 0.48859500  |
| H | 4.22578900  | 0.46190100  | 1.87810500  |
| H | 2.11315900  | -0.72166100 | 1.87711300  |
| H | 1.73729100  | 2.12645700  | 2.54701900  |
| H | 0.17762200  | -1.31820700 | 2.29138400  |
| H | -1.42592100 | -0.69933900 | 1.98549800  |
| H | -0.49926600 | 2.53218100  | 3.60962000  |
| H | -1.79886900 | 1.89900500  | 2.58330100  |
| H | -1.34718200 | 1.03710200  | 4.04658600  |

### TS4x-B

E(RB3LYP) = -1367.625418 a.u.

1 imaginary frequency found: -48.04 cm<sup>-1</sup>

|   |             |             |             |
|---|-------------|-------------|-------------|
| C | 1.86943900  | 0.14676700  | 1.41248900  |
| C | 1.36962300  | 0.34397400  | -0.21161900 |
| C | 2.63069900  | -0.17852100 | -1.00149500 |
| C | 3.76982600  | -0.42736100 | 0.02940700  |
| C | 3.37850300  | 0.34334300  | 1.29374800  |
| C | 0.04548500  | -0.26649000 | -0.52936600 |
| C | -0.02951400 | -1.61670300 | -1.23610400 |
| C | 1.33060700  | -2.32884800 | -1.28229700 |
| C | 2.39166000  | -1.41370600 | -1.88475800 |
| C | -1.14274200 | 0.46344700  | -0.35668600 |
| C | -1.09901700 | 1.89362400  | 0.05368300  |

|   |             |             |             |
|---|-------------|-------------|-------------|
| C | 0.07319000  | 2.57885700  | 0.10147800  |
| C | 1.31793900  | 1.89365500  | -0.27360900 |
| C | -0.59501800 | -1.45024100 | -2.67361800 |
| O | 2.31174100  | 2.53726500  | -0.56611900 |
| C | 0.15698800  | 4.04188700  | 0.42626000  |
| O | -2.22692800 | 2.51517200  | 0.45042200  |
| C | -3.43282200 | 2.54170000  | -0.35736800 |
| O | -2.31455200 | 0.02743200  | -0.75733000 |
| B | -3.33020000 | -0.94166800 | -0.19831600 |
| F | -2.72602800 | -2.16540700 | 0.14145400  |
| C | 5.15727300  | -0.07705400 | -0.50809000 |
| C | 1.48392800  | -1.14965500 | 1.97781900  |
| C | 0.17664200  | -1.52117000 | 2.16813800  |
| C | -0.22509900 | -2.92809100 | 2.54507000  |
| F | -3.88562600 | -0.37615400 | 0.96276400  |
| F | -4.27898500 | -1.10800700 | -1.19249800 |
| C | -0.81799200 | -0.55990700 | 1.91050200  |
| H | 2.94312300  | 0.65183400  | -1.63448700 |
| H | 2.08633100  | -1.11016500 | -2.88903500 |
| H | 3.33843800  | -1.94824300 | -2.00651100 |
| H | 1.22323200  | -3.24195700 | -1.87400600 |
| H | 1.63227600  | -2.64901000 | -0.28078600 |
| H | -0.74005000 | -2.23979600 | -0.69373100 |
| H | 0.71269000  | 4.56775900  | -0.35274600 |
| H | -0.83541400 | 4.47576200  | 0.52504400  |
| H | 0.70033600  | 4.20067700  | 1.36354900  |
| H | -4.11039400 | 1.75554000  | -0.03721600 |
| H | -3.87294100 | 3.52180100  | -0.17521400 |
| H | -3.19630200 | 2.43227600  | -1.41463600 |
| H | -0.54496100 | -2.41620600 | -3.18340400 |
| H | -1.63167200 | -1.12415500 | -2.65917300 |
| H | -0.02035200 | -0.73027500 | -3.26010500 |
| H | 3.76246300  | -1.49769600 | 0.27537200  |
| H | 5.21918000  | 0.98792200  | -0.75072000 |
| H | 5.93290300  | -0.30336200 | 0.22910700  |
| H | 5.38817200  | -0.64370300 | -1.41470500 |
| H | 3.61689000  | 1.40225600  | 1.18324600  |
| H | 3.89525100  | -0.02178800 | 2.18508500  |
| H | 1.36575800  | 0.95782400  | 1.94882800  |
| H | 2.26787500  | -1.88294200 | 2.14329600  |
| H | -0.60615500 | 0.48521400  | 2.08084200  |
| H | -1.86289500 | -0.83787500 | 1.90911200  |
| H | 0.62091100  | -3.61426800 | 2.49182800  |
| H | -0.62477400 | -2.95483700 | 3.56259600  |
| H | -1.01282700 | -3.28413100 | 1.87737000  |

#### 4x-B

E(RB3LYP) = -1367.682631 a.u.

|   |             |             |             |
|---|-------------|-------------|-------------|
| C | -1.05832800 | -0.07691800 | 0.22617700  |
| C | 0.33510000  | 0.20715600  | 0.78056700  |
| C | 1.44004400  | -0.32568400 | -0.19438800 |
| C | 1.10945000  | -1.75275300 | -0.62633700 |
| C | -0.30307100 | -2.05116600 | -1.02556100 |
| C | -1.32224800 | -1.26424700 | -0.59305100 |
| C | 1.50299400  | 0.49476100  | -1.56298200 |
| C | 3.02142000  | 0.64593200  | -1.82642400 |
| C | 3.63179600  | 0.83309300  | -0.43427200 |
| C | 2.89297300  | -0.23883700 | 0.39005100  |
| C | 0.44326200  | -0.43937400 | 2.24530900  |

|   |             |             |             |
|---|-------------|-------------|-------------|
| C | 1.86755000  | -0.93544400 | 2.56691300  |
| C | 2.97046200  | -0.10492800 | 1.91580000  |
| C | 0.45330300  | 1.74576400  | 0.91559200  |
| C | 0.38052400  | 2.44664500  | -0.41887900 |
| C | 0.82311900  | 1.83518600  | -1.51926700 |
| C | 5.15488000  | 0.71235000  | -0.39152700 |
| C | -0.23251900 | 3.81839700  | -0.42882400 |
| C | -0.56595200 | -1.54482000 | 2.59422600  |
| O | 1.93507800  | -2.64012100 | -0.73260900 |
| C | -0.52649700 | -3.26858200 | -1.86057900 |
| O | -2.61037400 | -1.51864900 | -0.93787700 |
| C | -3.33726600 | -2.43245800 | -0.08397900 |
| O | -1.96755200 | 0.71469300  | 0.55341200  |
| B | -3.45273700 | 1.17652900  | 0.02697300  |
| F | -3.38383500 | 1.20938800  | -1.33912100 |
| F | -4.35828600 | 0.28940200  | 0.55052900  |
| F | -3.54544100 | 2.42891600  | 0.59208300  |
| H | 3.35443900  | -1.19753700 | 0.13493000  |
| H | 3.94736900  | -0.45746300 | 2.25792400  |
| H | 2.89923100  | 0.94063400  | 2.23299500  |
| H | 1.97271900  | -1.97663200 | 2.23932300  |
| H | 1.97879800  | -0.94553900 | 3.65537300  |
| H | 0.22446000  | 0.39956500  | 2.91224400  |
| H | -0.37004000 | -4.17081700 | -1.26045000 |
| H | -1.53358300 | -3.28532200 | -2.27146500 |
| H | 0.20671900  | -3.30761100 | -2.66887900 |
| H | -3.48171900 | -2.00012300 | 0.90570100  |
| H | -4.30447600 | -2.57056800 | -0.56093500 |
| H | -2.81572200 | -3.38975500 | -0.01510000 |
| H | -0.41314700 | -1.83964000 | 3.63564800  |
| H | -1.60278300 | -1.21325600 | 2.50549600  |
| H | -0.43133700 | -2.44099300 | 1.98326600  |
| H | 3.34972500  | 1.82704000  | -0.06407100 |
| H | 5.47806100  | -0.27171600 | -0.74711400 |
| H | 5.62625300  | 1.46969800  | -1.02458100 |
| H | 5.54010600  | 0.84584300  | 0.62323500  |
| H | 3.41646400  | -0.27031200 | -2.27971500 |
| H | 3.23208100  | 1.47136900  | -2.51068800 |
| H | 1.04960900  | -0.07924800 | -2.37848100 |
| H | 0.74062600  | 2.33768000  | -2.48053000 |
| H | -0.35303800 | 2.09943600  | 1.55952900  |
| H | 1.38342100  | 1.99928600  | 1.42893300  |
| H | -0.21704300 | 4.26098900  | -1.42659900 |
| H | -1.27034100 | 3.77200900  | -0.08118000 |
| H | 0.30171600  | 4.48918700  | 0.25410400  |

### TS5-B

E(RB3LYP) = -1367.639506 a.u.

1 imaginary frequency found: -361.18 cm<sup>-1</sup>

|   |             |             |             |
|---|-------------|-------------|-------------|
| C | -1.09962500 | -0.35265600 | -0.65394800 |
| C | 0.12760000  | -1.00187800 | -0.41937700 |
| C | 1.35098100  | -0.26253000 | -0.49861500 |
| C | 1.30691000  | 0.97415000  | -1.37895600 |
| C | 0.03738400  | 1.72626000  | -1.36955600 |
| C | -1.13267300 | 1.01884300  | -1.11233500 |
| C | 2.71243200  | -0.97512700 | -0.45563500 |
| C | 2.59378700  | -2.50255700 | -0.55550200 |
| C | 1.47557700  | -3.01969900 | 0.34639700  |
| C | 0.10645200  | -2.49299600 | -0.10401100 |



|   |             |             |             |
|---|-------------|-------------|-------------|
| C | -0.41049700 | -3.28305200 | -1.33187700 |
| C | 3.50041200  | -0.54262300 | 0.81417500  |
| C | 5.01715200  | -0.63071000 | 0.63740800  |
| O | 2.27395000  | 1.35146800  | -2.01288300 |
| C | -0.02041200 | 3.08805800  | -1.98462900 |
| O | -2.25435400 | 1.72626700  | -1.28754500 |
| C | -3.57158800 | 1.17759900  | -1.55280100 |
| O | -2.26404700 | -0.94948300 | -0.50283300 |
| B | -2.88723400 | -1.54468400 | 0.74191900  |
| F | -3.04518600 | -2.91715800 | 0.56027800  |
| F | -4.13267400 | -0.92794400 | 0.90026900  |
| F | -2.06519400 | -1.27339600 | 1.84982000  |
| C | 3.03369500  | 0.86563600  | 1.17108900  |
| C | 1.52147900  | 0.91747000  | 1.13750200  |
| C | 0.90802700  | 2.18139600  | 0.90360800  |
| C | -0.25304200 | 2.71333700  | 1.58509700  |
| C | -0.48957200 | 4.04025600  | 1.47617200  |
| C | -1.10960700 | 1.82655900  | 2.45346200  |
| H | 3.26826900  | -0.59627900 | -1.31678700 |
| H | 2.40323900  | -2.79479700 | -1.59224400 |
| H | 3.55077800  | -2.95480500 | -0.28173300 |
| H | 1.45024700  | -4.11270400 | 0.34204900  |
| H | 1.66515100  | -2.72238800 | 1.38299000  |
| H | -0.60321500 | -2.65958800 | 0.70512300  |
| H | -0.56699600 | 3.77824500  | -1.33481600 |
| H | 0.98345100  | 3.46944100  | -2.16485900 |
| H | -0.56346000 | 3.05988200  | -2.93417300 |
| H | -4.01053100 | 0.75377200  | -0.65508700 |
| H | -4.14326200 | 2.03703000  | -1.89843200 |
| H | -3.52028200 | 0.42345200  | -2.33635900 |
| H | -0.47948900 | -4.34249300 | -1.07196700 |
| H | -1.40188200 | -2.94745800 | -1.62985500 |
| H | 0.26333800  | -3.18383000 | -2.18649900 |
| H | 3.20940400  | -1.20899700 | 1.63493100  |
| H | 5.53326400  | -0.35378900 | 1.56084400  |
| H | 5.33405700  | -1.64333000 | 0.37583500  |
| H | 5.35584000  | 0.04378500  | -0.15527300 |
| H | 3.44419900  | 1.59465100  | 0.46484100  |
| H | 3.38202200  | 1.15560100  | 2.16865100  |
| H | 1.02286400  | 0.27019500  | 1.85139700  |
| H | 1.52035400  | 2.92030400  | 0.39582000  |
| H | 0.14998500  | 4.68379900  | 0.88357300  |
| H | -1.31354300 | 4.51068000  | 1.99937200  |
| H | -0.54013500 | 1.46734300  | 3.31694600  |
| H | -1.97280100 | 2.37824000  | 2.82650400  |
| H | -1.47083000 | 0.94351000  | 1.92637900  |

## 5-B

E(RB3LYP) = -1367.680857 a.u.

|   |             |             |             |
|---|-------------|-------------|-------------|
| C | -0.43823000 | -2.56194800 | 0.21196300  |
| C | -0.23840500 | -1.07153600 | 0.33516700  |
| C | -1.39708100 | -0.11897900 | 0.35290500  |
| C | -2.84068000 | -0.69077500 | 0.29165700  |
| C | -2.93422100 | -2.20714900 | 0.50267400  |
| C | -1.84366400 | -2.94483700 | -0.27347800 |
| C | -1.26644400 | 0.92700700  | -0.84058100 |
| C | -2.70960300 | 1.13868800  | -1.31420000 |
| C | -3.40942500 | -0.20635900 | -1.06963600 |
| C | -0.55148100 | 2.16998700  | -0.26240100 |

|   |             |             |             |
|---|-------------|-------------|-------------|
| C | 0.07738100  | 1.69059000  | 1.12135500  |
| C | -1.10471200 | 0.78495300  | 1.56939700  |
| C | 1.05792200  | -0.58308700 | 0.47873700  |
| C | 1.24020700  | 0.75292500  | 0.95048800  |
| C | -4.93496600 | -0.12214200 | -1.10688700 |
| C | 0.37425300  | 2.94009700  | -1.18503900 |
| C | 1.34900400  | 2.19473400  | -2.06095100 |
| C | 0.35712500  | 2.83859000  | 2.08391000  |
| O | -1.69861900 | 0.84980100  | 2.60251800  |
| O | 2.12102300  | -1.39285000 | 0.33896700  |
| B | 2.72858200  | -1.58139000 | -1.01445300 |
| F | 1.72409400  | -1.82115900 | -1.97126000 |
| O | 2.35757100  | 1.26182100  | 1.37097300  |
| C | 3.64195700  | 0.57589000  | 1.53974900  |
| C | -0.09200200 | -3.23722000 | 1.56739900  |
| C | 0.28917600  | 4.27350900  | -1.22042000 |
| F | 3.60636500  | -2.65449900 | -0.92000200 |
| F | 3.42587700  | -0.40240700 | -1.38189400 |
| H | -3.40902900 | -0.19435100 | 1.08519900  |
| H | -2.85440000 | -2.43981400 | 1.56913500  |
| H | -3.92385800 | -2.55335400 | 0.19164500  |
| H | -1.96371500 | -4.02641600 | -0.16907100 |
| H | -1.93160300 | -2.72769400 | -1.34259000 |
| H | 0.29874600  | -2.91087500 | -0.51297200 |
| H | 1.10471600  | 3.51534700  | 1.67138000  |
| H | -0.56365500 | 3.39885500  | 2.25294900  |
| H | 0.71623800  | 2.46991200  | 3.04519200  |
| H | 4.04417800  | 0.32840300  | 0.56333600  |
| H | 4.25119800  | 1.31360900  | 2.05434900  |
| H | 3.50439100  | -0.31459100 | 2.14490500  |
| H | -0.20291100 | -4.31898600 | 1.46078600  |
| H | 0.93762600  | -3.02302200 | 1.85124800  |
| H | -0.75387700 | -2.90275300 | 2.36887900  |
| H | -3.08124700 | -0.90398200 | -1.84981900 |
| H | -5.28230400 | 0.22503100  | -2.08399000 |
| H | -5.39784200 | -1.09501600 | -0.92119200 |
| H | -5.30500100 | 0.57688600  | -0.34966700 |
| H | -3.19498000 | 1.91772700  | -0.71433800 |
| H | -2.75548100 | 1.45533900  | -2.35875500 |
| H | -0.67693700 | 0.46753400  | -1.63332000 |
| H | -1.32667400 | 2.87032300  | 0.06196800  |
| H | -0.42472700 | 4.81814000  | -0.61192300 |
| H | 0.93160500  | 4.86272400  | -1.86568300 |
| H | 2.00456800  | 1.52184800  | -1.50335900 |
| H | 0.82860800  | 1.57349700  | -2.79681300 |
| H | 1.97996400  | 2.89741700  | -2.60731300 |
